# Supplementary material
Source: Springer Nature journal article supplement (https://www.springermedizin.de/resource/supplementary/12967_2011_849_MOESM10_ESM.pdf/9577204)

**A**SH31 STEAP<sub>281-296</sub> CTL assay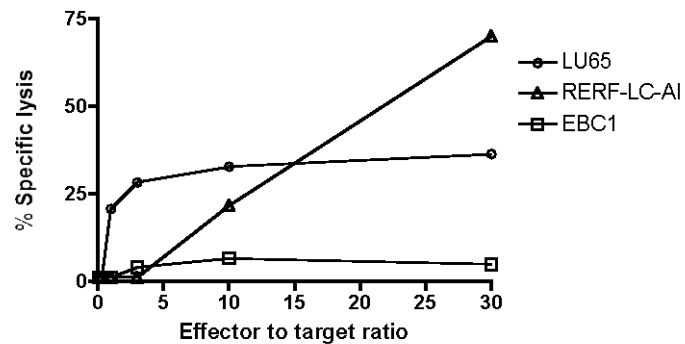Sa12 STEAP<sub>281-296</sub> CTL assay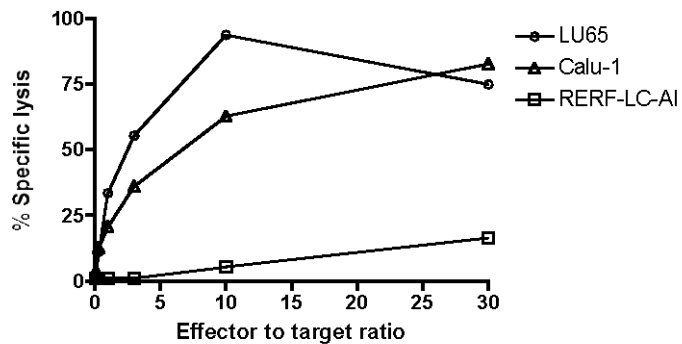**B**SK32 EZH2<sub>95-109</sub> CTL assay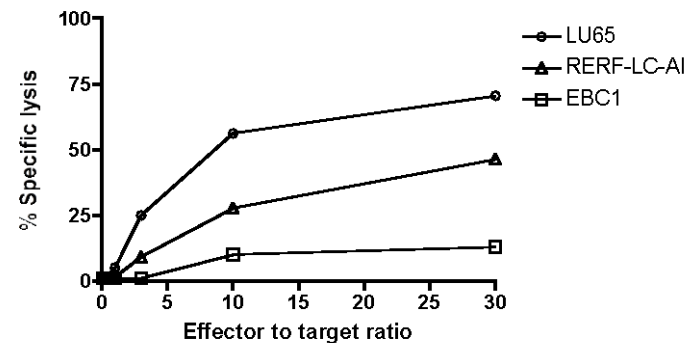Sa361 EZH2<sub>95-109</sub> CTL assay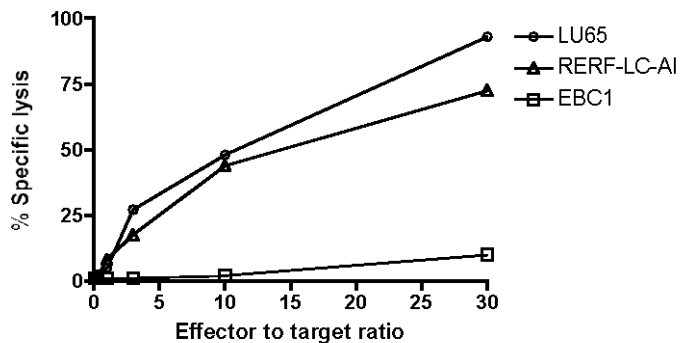Sa362 EZH2<sub>95-109</sub> CTL assay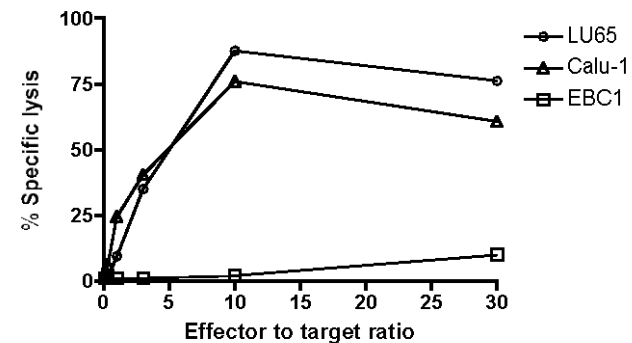

Supplement: MOESM10 [file 9577204]
